# Supplementary material for: Experimental Studies of Front-of-Package Nutrient Warning Labels on Sugar-Sweetened Beverages and Ultra-Processed Foods: A Scoping Review
Source: MDPI journal article supplement (doi:10.3390/nu12020569), 2020-02-22
Supplement: s1 [file s1]

**Table S3.** Warning label designs

| OCTAGON                                                                                                                                                                                                                                                                                                                                                                    | RECTANGLE                                                                                                                                                                                             | TRIANGLE                                                                                                                                                                                                                                                                                                                                              |
|----------------------------------------------------------------------------------------------------------------------------------------------------------------------------------------------------------------------------------------------------------------------------------------------------------------------------------------------------------------------------|-------------------------------------------------------------------------------------------------------------------------------------------------------------------------------------------------------|-------------------------------------------------------------------------------------------------------------------------------------------------------------------------------------------------------------------------------------------------------------------------------------------------------------------------------------------------------|
|   <p>Egnell et al. [63,76,79]    Ang, Agrawal, &amp; Finkelstein [70]</p>                                                                                                                                |                                     |  <p>Health Canada / Santé Canada</p> <p>Goodman et al. [64]</p> <p>Also tested with "High in" text (not shown)</p>                                                                                                                                                 |
|   <p>Ares et al. [78]    Machin et al. [75]</p>                                                                                                                                                          |   <p>Grummon et al. [71]</p>        |   <p>Khandpur et al. [72]</p>                                                                                                                                                   |
|   <p>Arrúa et al. [59]    Machin et al. [67,68]</p> <p>Lima et al. [66,73,74]</p>                                                                                                                        |  <p>Acton &amp; Hammond [61]</p>                                                                                     |  <p>Khandpur et al. [65]</p>                                                                                                                                                                                                                                       |
|   <p>Acton &amp; Hammond [61]    Khandpur et al. [72]</p>                                                                                                                                              | <p><b>CIRCLE</b></p>  <p>Health Canada</p> <p>Acton &amp; Hammond [62]</p>                                          |  <p>Acton &amp; Hammond [61]</p>                                                                                                                                                                                                                                  |
|     <p>Grummon et al. [71]</p> |  <p>Health Canada</p> <p>Acton et al. [69]</p>                                                                     | <p><b>OTHER</b></p>  <p>Health Canada / Santé Canada</p>  <p>Health Canada / Santé Canada</p> <p>Goodman et al. [64]</p> <p>Also tested with "High in" text (not shown)</p> |
|  <p>Health Canada / Santé Canada</p> <p>Goodman et al. [64]</p> <p>Also tested with "High in" text (not shown)</p> <p>(not shown) Black octagonal symbol with "WARNING: high sugar content" text</p> <p>Bollard et al. [58]</p>                                                         |  <p>Health Canada / Santé Canada</p> <p>Goodman et al. [64]</p> <p>Also tested with "High in" text (not shown)</p> |  <p>Neal et al. [60]</p>                                                                                                                                                                                                                                         |
